# Supplementary material for: A translational protocol optimizes the isolation of plasma-derived extracellular vesicle proteomics
Source: Research Square preprint supplement (doi:10.21203/rs.3.rs-5781026/v1), 2025-01-08
Supplement: Supplementary file 1 [file 5b7024777155ae1fe0131f67.xlsx]

## Sheet: BCT prizes
Supplementary Table 1: Cost comparison of the preservation/blood collection tubes evaluated.
	PRIZES OF BLOOD COLLECTION TUBES
	material	number	manufactor	amount	costs
	RNA Complete BCT CE	230579	Streck	1	14.04
	S-Monovette Citrat 9NC	21067001	Sarstedt	1	0.38
	ACD-A Vacuette	455055	greiner bio one	1	0.2
	Cell free DNA BCT CE	218997	Streck	1	12
	S-Monovette EDTA K3E	21066001	Sarstedt	1	0.24
