# Supplementary material for: A translational protocol optimizes the isolation of plasma-derived extracellular vesicle proteomics
Source: Research Square preprint supplement (doi:10.21203/rs.3.rs-5781026/v1), 2025-01-08
Supplement: Supplementary file 2 [file ddf249c0690d77f5a02d535a.xlsx]

## Sheet: S9a Cost summary
Supplementary Table S9a: Comparative calculation of costs for consumables to perform plasma-derived EV proteomics
Differential Ultracentrifugation						final cost subtotal (€):	27.552	Notes (if reuse possible):
material	number	manufacturer	amount	unit	costs	amount needed	final cost
1x PBS			1	L	2.2715	8.2	0.015006
Seton UZ tubes	S5031	Seton	50	tubes	278.58	1	5.5716
UZ Maintenance			once per year		2635.85	/120	21.9654
Density Gradient Ultracentrifugation						final cost subtotal (€):	31.6757
material	number	manufacturer	amount	unit	costs	amount needed	final cost
Optiprep	D1556	Sigma Aldrich	250	mL	361.7	2.8	4.05104
Buffer 1			1	L	22.8454	0.6	0.01371
Buffer2			1	L	14.7854	5	0.07395
Seton UZ tubes	S5031	Seton	50	tubes	278.58	1	5.5716
UZ Maintenance			once per year		2635.85	/120	21.9654
SEC Sepharose CL-4B Columns						final cost subtotal (€):	28.9984
material	number	manufacturer	amount	unit	costs	amount needed	final cost
SEPHAROSE CL-4B	CL4B200-100ML	SUPELCO	106	mL	668.78	26	16.404	10x use
Econo-Column 1.5 x 20 cm	7374152	Bio-Rad Laboratories	4	columns	294.525	1	0.736312	100x use
1x PBS			1	L	2.16	191.25	0.41
Amicon Ultra-15 10kD	UFC901096	Merck	96	ultrafilter units	1096.67	1	11.4236
NaOH 0,5M			500	mL	1.82	1mL	0.00364
NaN3 0,05% in PBS			250	mL	0.83	40	0.02075
SEC Izon column qEV2						final cost subtotal (€):	42.9191
material	number	manufacturer	amount	unit	costs	amount needed	final cost
qEV2 Columns	IC2-35	Izon	2	columns	309	1	30.9	5x use
1x PBS			1	L	2.2715	170	0.2562
Amicon Ultra-15 10kD	UFC901096	Merck	96	ultrafilter units	1096.67	1	11.4236
NaOH 0,5M			500	mL		2	0.00728
NaN3 0,05% in PBS			250	mL	0.83	100	0.332
RIPA Lysis						final cost subtotal (€):	10.7814
material	number	manufactor	amount	unit	costs	amount needed	final cost
Sodium orthovanadate	S6508	Sigma Aldrich	10	g	72.12		0.01
NaF	201154	Sigma Aldrich	100	g	10.14		0.001
Protease inh.	A32955	Thermo Scientific	30	tablets	191.59	0.5	3.19317
Phospatase inh.	4906845001	Roche	10	tablets	146.52	0.5	7.326
RIPA Incomplete Buffer							0.02
TCA	1008070100	Sigma Aldrich	100mL	mL	30.25	0,5mL	0.15125
Aceton			1L	L	27	3mL	0.08
BCA Assay						final cost subtotal (€):	5.03
material	number	manufactor	amount	unit	costs	amount needed	final cost
Micro BCA Protein Assay Kit-500 mL	23235	Thermo Scientific	500	mL	399.84	3mL	2.39904
96-Well-Platte, unbehandelte Oberfläche, 25/Packung	FE-0521	Thermo Scientific	100	plates	262.99	1	2.63
						TOTAL COSTS (€)
						Total cost per sample using DGUC+SEC+UF (SEC=Sepharose CL-4B)	76.4855

## Sheet: S9b Reagents, Solutions
Supplementary Table S9b: Calculation of costs (€) to produce reagents and solutions required for the isolation and proteomic analysis of plasma-derived EVs
1L 1x PBS			2.2715
material	number	manufacturer	amount	unit	costs	nedded amount	final cost
10x PBS	70011051	Gibco	1	L	5.5692	100mL	0.55692
Steritop-GP 1000mL Express Plus PES .22u	S2GPT10RE	Millipore	12	filters	123.45	1	1.71458
500mL of 0,5M NAOH			1.82
material	number	manufacturer	amount	unit	costs	nedded amount	final cost
NAOH 1M	10528240	Fisher Cemicals	1	L	5.4383	250	1.36
1L 1x PBS			1	L	1.82873	250	0.4575
Sodium azide 0,05% 250mL			0.834375
material	number	manufacturer	amount	unit	costs	nedded amount	final cost
Sodium azide	30175.01	Serva	100	g	33.1772	4g	6.02824
			50		6.03	3.125	0.376875
1L 1x PBS			1	L	1.82873	250	0.4575
Density Gradient Buffer 1 1L			24.1738
material	number	manufacturer	amount	unit	costs	nedded amount	final cost
Sucrose	S9378	Sigma Aldrich	1	kg	109.37	85,58g	9.35
EDTA 0,5M ph8,5	R013	G-Biosciences	100	mL	66.74	12mL	8
Tris Base	T1503	Sigma Aldrich	1	kg	230.72	7,27g	1.68
Steritop-GP 1000mL Express Plus PES .22u	S2GPT10RE	Millipore	12	filters	123.45	1	5.14375
Density Gradient Buffer 2 1L			16.1137
material	number	manufacturer	amount	unit	costs	nedded amount	final cost
Sucrose	S9378	Sigma Aldrich	1	kg	109.37	85,58g	9.35
EDTA 0,5M ph8,5	R013	G-Biosciences	100	mL	66.74	2mL	1.34
Tris Base	T1503	Sigma Aldrich	1	kg	230.72	1,21g	0.28
Steritop-GP 1000mL Express Plus PES .22u	S2GPT10RE	Millipore	12	filters	123.45	1	5.14375
